# Supplementary material for: Every-other-day feeding extends lifespan but fails to delay many symptoms of aging in mice
Source: PubMed Central journal article supplement (PMC5537224; doi:10.1038/s41467-017-00178-3), 2017-07-24
Supplement: 41467_2017_178_MOESM2_ESM.pdf [file 41467_2017_178_MOESM2_ESM.pdf]

File Name: Peer Review File

Description:

File Name: Supplementary Information

Description: Supplementary Figures, Supplementary Tables.

File Name: Supplementary Data 1

Description: List of differentially expressed genes in the brain of AL or EOD mice

File Name: Supplementary Data 2

Description: Analyses of differentially expressed genes in the brain of AL or EOD mice using Ingenuity Pathway Analysis software

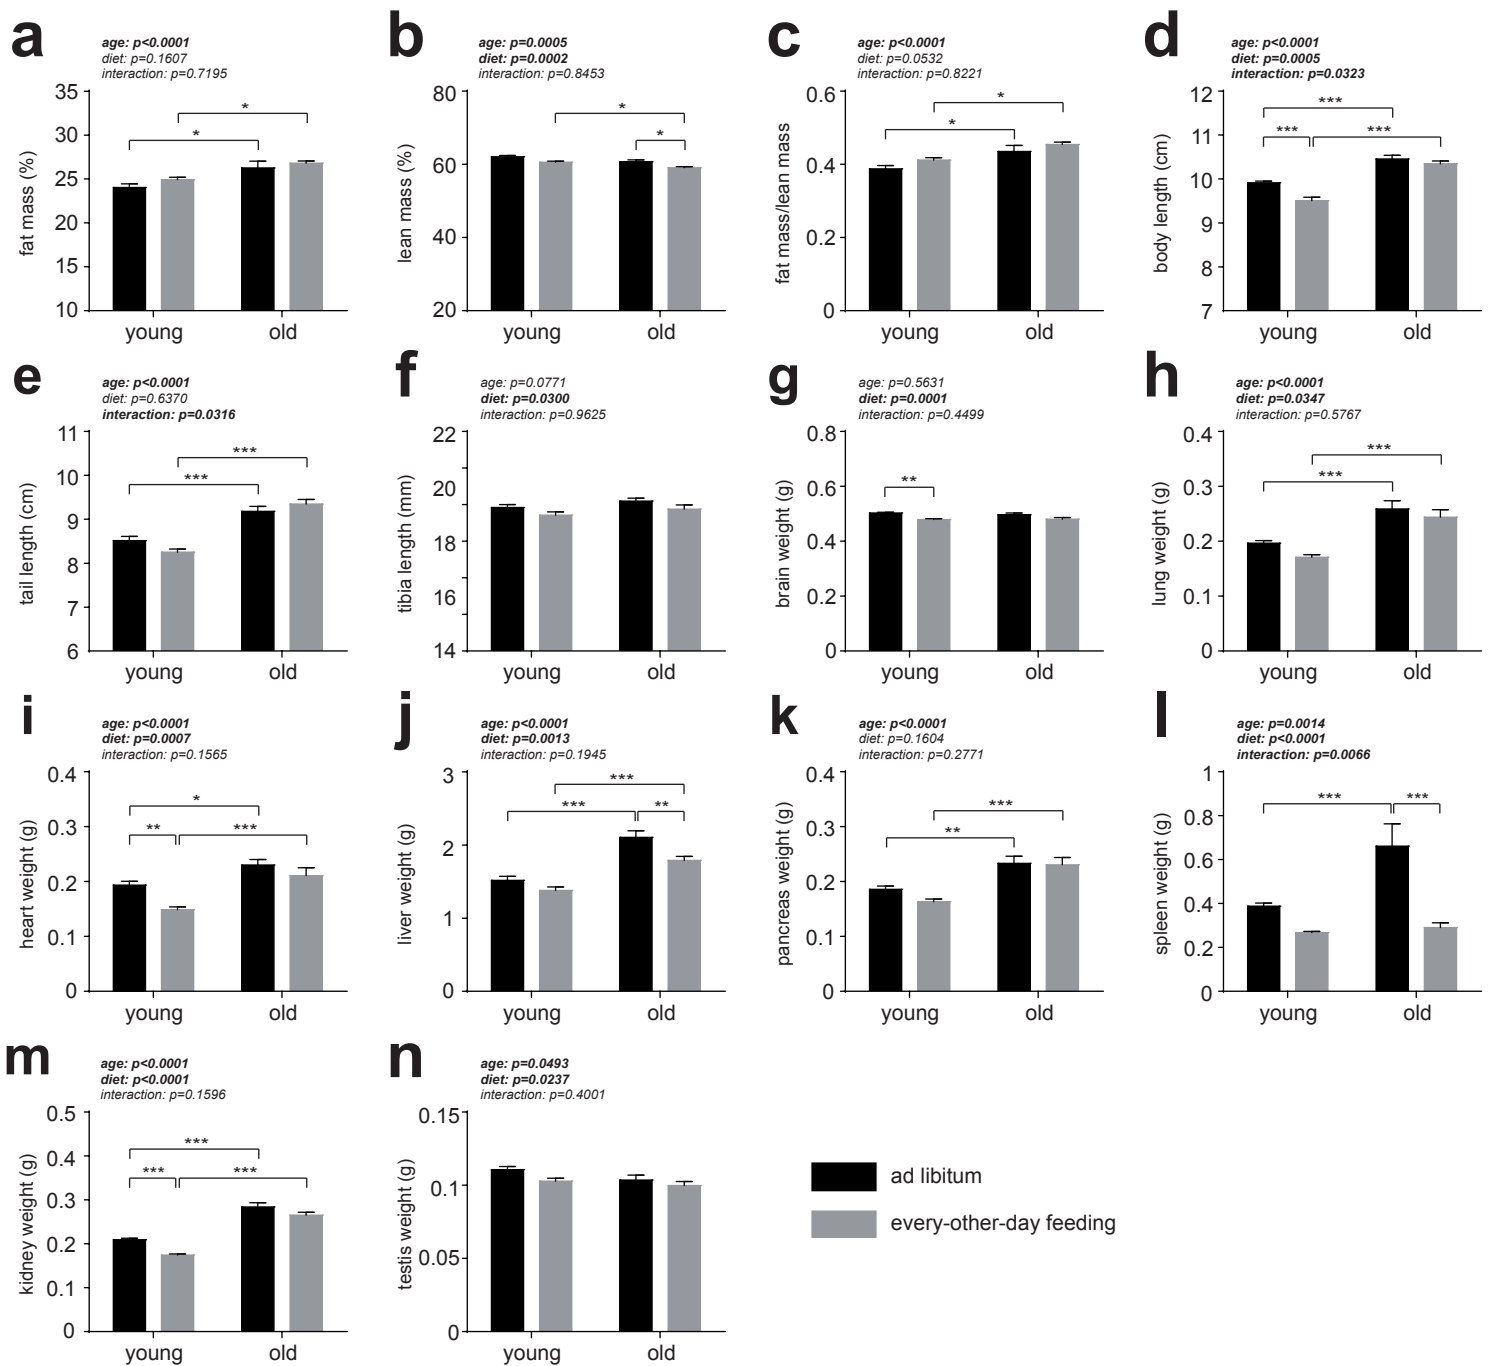

### Supplementary Figure 1

**Body composition and organ weights.** (a) Fat mass, (b) lean mass, and (c) fat/lean mass ratio were determined using a body composition analyzer (2-way ANOVA; young+AL:  $n = 16$ , young+EOD:  $n = 16$ , old+AL:  $n = 20$ , old+EOD:  $n = 22$ ). (d) Body length, (e) tail length, (f) tibia length and weights of (g) brain, (h) lung, (i) heart, (j) liver, (k) pancreas, (l) spleen, (m) kidney, and (n) testis as measured in young and aged mice (2-way ANOVA; young+AL:  $n = 15$ , young+EOD:  $n = 15$ , old+AL:  $n = 11$ , old+EOD:  $n = 10$ ). AL = ad libitum, EOD = every-other-day feeding. Data are presented as mean  $\pm$  SEM.

# Main leukocyte populations

Leukocytes  
(CD45<sup>+</sup>)

young AL      young EOD      old AL      old EOD

B cell definition:  
CD19<sup>+</sup> B220<sup>+</sup>

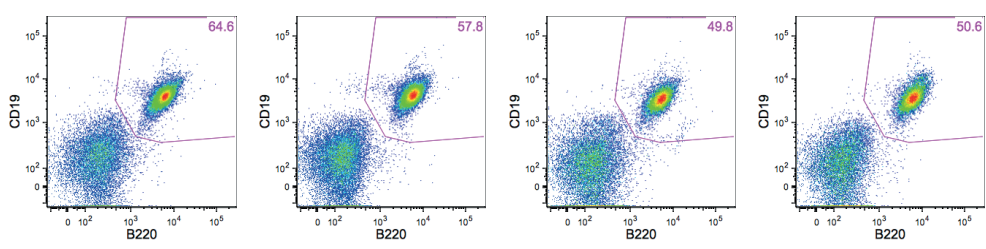

Non-B cells  
(CD19<sup>-</sup> B220<sup>-</sup>)

T cell definition:  
CD3<sup>+</sup> CD5<sup>+</sup>

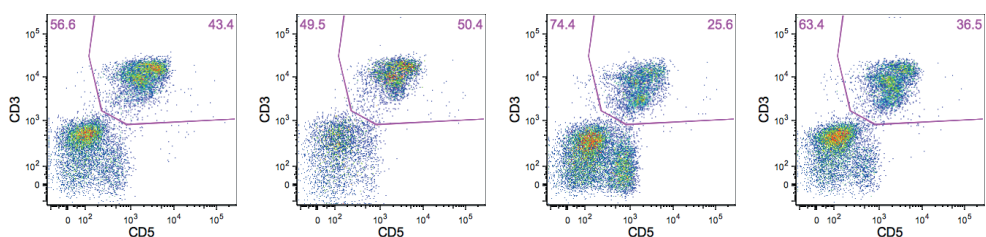

Non-B non-T cells  
(CD19<sup>-</sup> B220<sup>-</sup>/CD3<sup>-</sup> CD5<sup>-</sup>)

Granulocyte definition:  
Gr-1<sup>+</sup> CD11b<sup>+</sup>

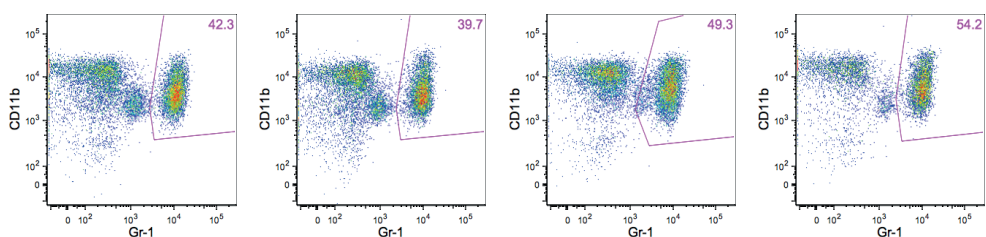

Non-B non-T cells non-granulocyte  
(CD19<sup>-</sup> B220<sup>-</sup>/CD3<sup>-</sup> CD5<sup>-</sup>/Gr-1<sup>-</sup>)

NK cell definition:  
NKp46<sup>+</sup> or NK1.1<sup>+</sup>

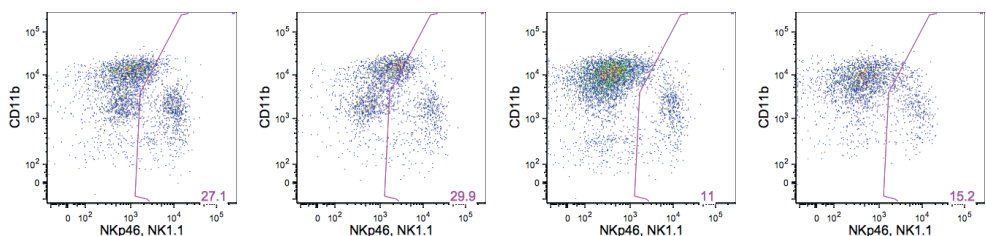

Non-B non-T cells  
non-granulocyte non-NK cells  
(CD19<sup>-</sup> B220<sup>-</sup>/CD3<sup>-</sup> CD5<sup>-</sup>/Gr-1<sup>-</sup>/NKp46<sup>-</sup> NK1.1<sup>-</sup>)

Monocyte definition:  
CD11b<sup>+</sup>

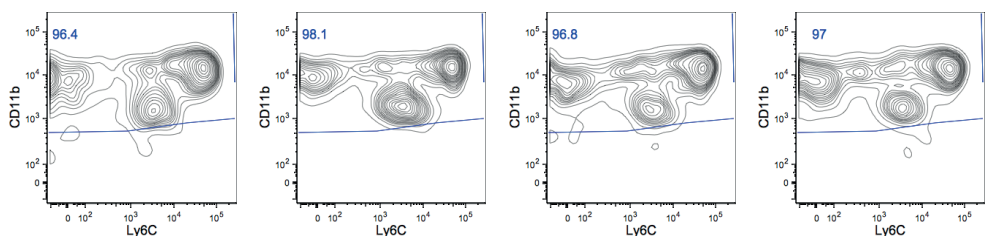

Numbers within the gates indicate percentages of the parent gate

**Supplementary Figure 2**  
**Definition and gating strategy of main peripheral blood leukocytes analyzed using a 10-color flow cytometer.**

# T cell subsets

T cells

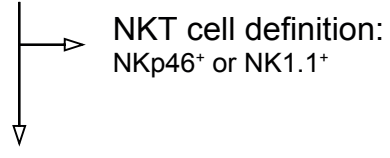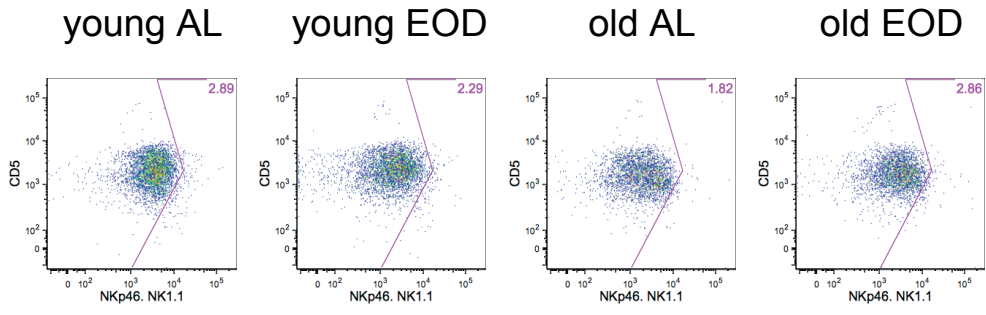

non-NKT cells

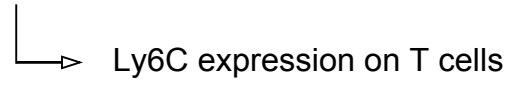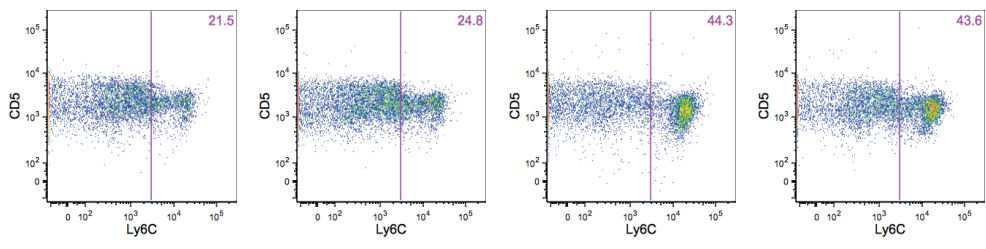

Numbers within the gates indicate percentages of T cells

# B cell subsets

B cells

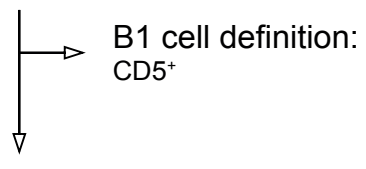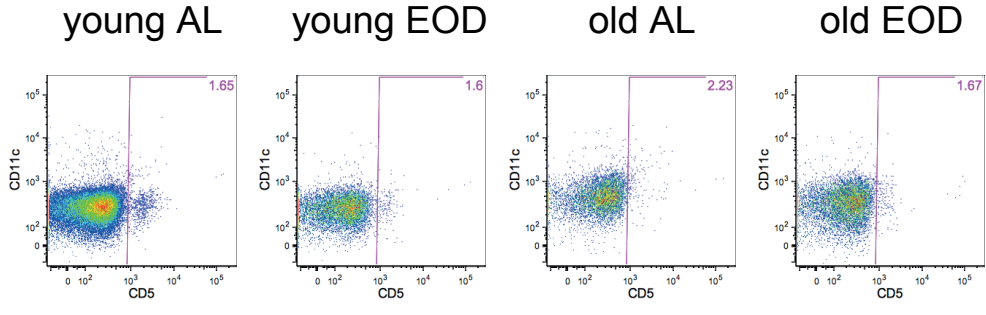

B2 cells  
(CD5<sup>-</sup>)

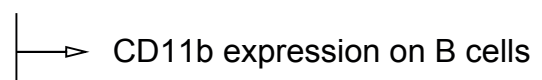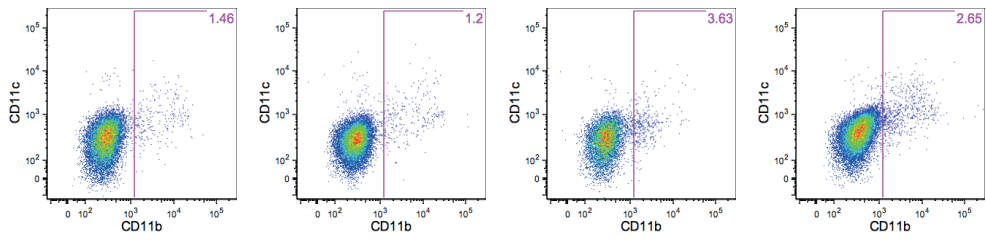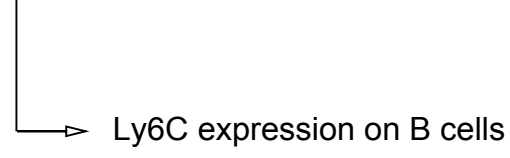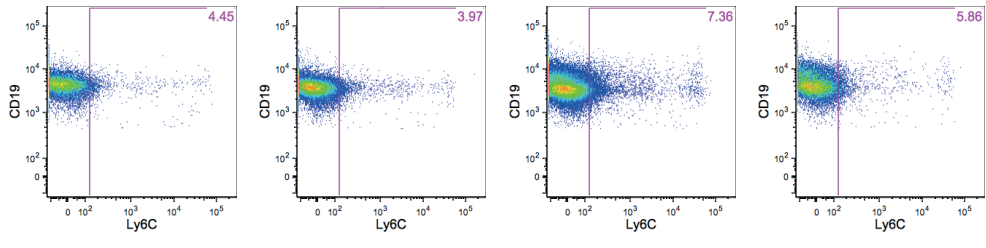

Numbers within the gates indicate percentages of B cells

Supplementary Figure 3

Definition and gating strategy of T and B cell subsets analyzed using a 10-color flow cytometer.

# Monocyte subsets

monocytes

Ly6C expression on monocytes

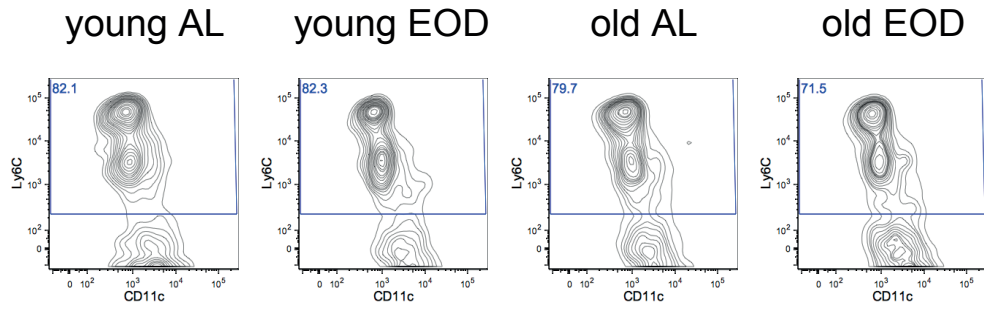

Numbers within the gates indicate percentages of monocytes

# NK cell subsets

NK cells

CD11b and CD11c expression on NK cells

Ly6C expression on NK cells

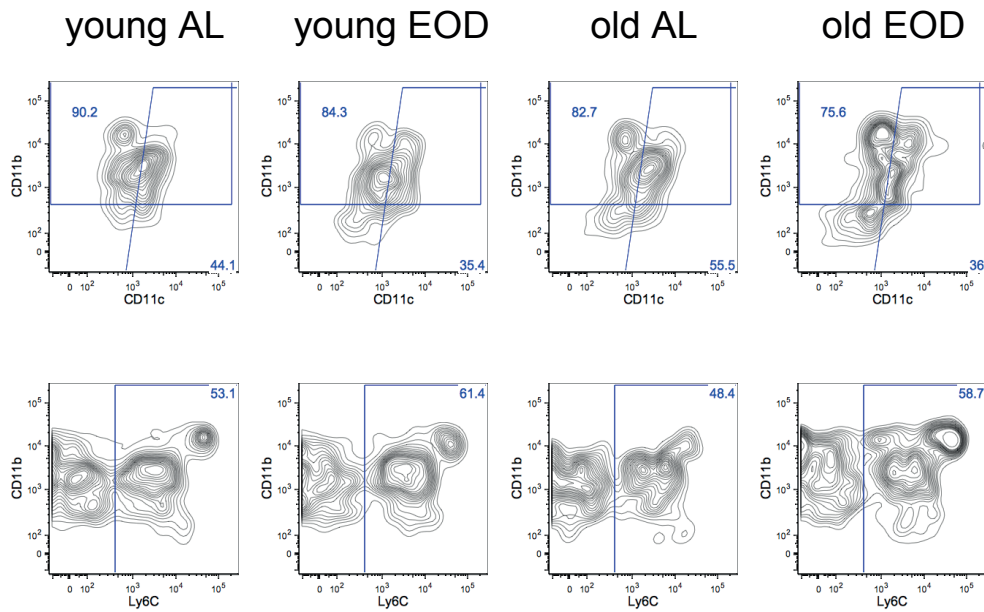

Numbers within the gates indicate percentages of NK cells

**Supplementary Figure 4**  
**Definition and gating strategy of monocyte and NK cell subsets analyzed using a 10-color flow cytometer.**

### Supplementary Table 1

**Tumor burden in mice that died of natural causes and were kept on either lifelong ad libitum access to food or on every-other-day feeding.** The numbers of tumors per animal are shown as mean +/- SEM and differed significantly between groups (t-test,  $p=0.0308$ ).

|                                   | <b>ad libitum<br/>(n = 29)</b> | <b>every-other-day feeding<br/>(n = 20)</b> | <b>p-value</b> |
|-----------------------------------|--------------------------------|---------------------------------------------|----------------|
| <b>number of malignant tumors</b> | <b>31 (= 83.8% of tumors)</b>  | <b>16 (= 94.1% of tumors)</b>               |                |
| lymphoma                          | 13                             | 6                                           |                |
| bronchoalveolar carcinoma         | 7                              | 1                                           |                |
| histiocytic sarcoma               | 5                              | 3                                           |                |
| hepatocellular carcinoma          | 3                              | 4                                           |                |
| leukemia                          | 1                              | 0                                           |                |
| papillary colon carcinoma         | 1                              | 1                                           |                |
| fibrosarcoma                      | 1                              | 0                                           |                |
| <b>number of benign tumors</b>    | <b>6 (= 16.2% of tumors)</b>   | <b>1 (= 5.9% of tumors)</b>                 |                |
| papillary thyroid adenoma         | 4                              | 0                                           |                |
| bronchoalveolar adenoma           | 2                              | 1                                           |                |
| <b>overall tumor burden</b>       | <b>37 tumors in 29 animals</b> | <b>17 tumors in 20 animals</b>              |                |
| <b>tumor per animal</b>           | <b>1.29 ± 0.13</b>             | <b>0.85 ± 0.13</b>                          | <b>0.0308</b>  |

## Supplementary Table 2

**Aging phenotypes prevented by every-other-day feeding.** Aging phenotypes attenuated by every-other-day feeding specifically in old mice on lifelong treatment without apparent changes in young animals on short-term treatment.

| Test                      | Parameter                                  | Aging phenotype | Effect of every-other-day feeding |                               |
|---------------------------|--------------------------------------------|-----------------|-----------------------------------|-------------------------------|
|                           |                                            |                 | Aged mice/<br>lifelong EOD        | Young mice/<br>short-term EOD |
| <b>Brain</b>              |                                            |                 |                                   |                               |
| Histopathology            | Eosinophilic thalamic inclusions           | Increased       | Decreased                         | Not applicable                |
| <b>Clinical chemistry</b> |                                            |                 |                                   |                               |
| Clinical chemistry        | Plasma urea concentration                  | Increased       | Decreased                         | No effect                     |
| Clinical chemistry        | Plasma insulin concentrating after fasting | Increased       | Decreased                         | No effect                     |
| <b>Immune system</b>      |                                            |                 |                                   |                               |
| Immunology                | NKT cell frequencies                       | Decreased       | Increased                         | No effect                     |
| <b>Kidney</b>             |                                            |                 |                                   |                               |
| Histopathology            | Urinary casts                              | Increased       | Decreased                         | No effect                     |
| <b>Liver</b>              |                                            |                 |                                   |                               |
| Histopathology            | Microgranuloma                             | Increased       | Decreased                         | No effect                     |
| <b>Metabolism</b>         |                                            |                 |                                   |                               |
| Indirect calorimetry      | Respiratory exchange rate                  | Decreased       | Increased                         | No effect                     |

### Supplementary Table 3

**Age-sensitive traits ameliorated by every-other-day feeding in aged mice on lifelong treatment and with similar effects in young mice on short-term treatment.**

| Test                                      | Parameter                                    | Aging phenotype | Effect of every-other-day feeding |                               |
|-------------------------------------------|----------------------------------------------|-----------------|-----------------------------------|-------------------------------|
|                                           |                                              |                 | Aged mice/<br>lifelong EOD        | Young mice/<br>short-term EOD |
| <b><i>Behavior and cognition</i></b>      |                                              |                 |                                   |                               |
| Open field                                | Exploratory activity-related measures        | Decreased       | Increased                         | Increased                     |
| Open field                                | Resting duration                             | Decreased       | Increased                         | Increased                     |
| SHIRPA                                    | Locomotor activity                           | Decreased       | Increased                         | Increased                     |
| <b><i>Body size and organ weights</i></b> |                                              |                 |                                   |                               |
| Body size                                 | Body length                                  | Increased       | Decreased                         | Decreased                     |
| Organ weight                              | Lung weight                                  | Increased       | Decreased                         | Decreased                     |
| Organ weight                              | Heart weight                                 | Increased       | Decreased                         | Decreased                     |
| Organ weight                              | Liver weight                                 | Increased       | Decreased                         | Decreased                     |
| Organ weight                              | Kidney weight                                | Increased       | Decreased                         | Decreased                     |
| Organ weight                              | Spleen weight                                | Increased       | Decreased                         | Decreased                     |
| <b><i>Clinical chemistry</i></b>          |                                              |                 |                                   |                               |
| Clinical chemistry                        | Plasma lactate dehydrogenase activity        | Increased       | Decreased                         | Decreased                     |
| Clinical chemistry                        | Plasma unsaturated iron binding capacity     | Increased       | Decreased                         | Decreased                     |
| <b><i>Cardiovascular system</i></b>       |                                              |                 |                                   |                               |
| Echocardiography                          | Interventricular septum in diastole          | Increased       | Decreased                         | Decreased                     |
| Echocardiography                          | Left ventricular inner dimension in diastole | Increased       | Decreased                         | Decreased                     |
| Echocardiography                          | Left ventricular mass                        | Increased       | Decreased                         | Decreased                     |
| <b><i>Eye</i></b>                         |                                              |                 |                                   |                               |
| Virtual drum                              | Visual acuity                                | Decreased       | Increased                         | Increased                     |
| <b><i>Hematology</i></b>                  |                                              |                 |                                   |                               |
| Hematology                                | Hemoglobin                                   | Decreased       | Increased                         | Increased                     |
| Hematology                                | Hematocrit                                   | Decreased       | Increased                         | Increased                     |
| Hematology                                | Red blood cell distribution width            | Increased       | Decreased                         | Decreased                     |
| Hematology                                | Platelets volume                             | Increased       | Decreased                         | Decreased                     |
| Hematology                                | Platelets distribution width                 | Increased       | Decreased                         | Decreased                     |
| <b><i>Immune system</i></b>               |                                              |                 |                                   |                               |
| Immunology                                | T cell frequencies                           | Decreased       | Increased                         | Increased                     |
| Immunology                                | CD11c <sup>+</sup> NK cell frequencies       | Increased       | Decreased                         | Decreased                     |
| <b><i>Kidney</i></b>                      |                                              |                 |                                   |                               |
| Histopathology                            | Tubular luminal space                        | Increased       | Decreased                         | Decreased                     |
| <b><i>Metabolism</i></b>                  |                                              |                 |                                   |                               |
| Indirect calorimetry                      | Oxygen consumption/body weight               | Decreased       | Increased                         | Increased                     |
| Indirect calorimetry                      | Carbon dioxide production/body weight        | Decreased       | Increased                         | Increased                     |
| Indirect calorimetry                      | Heat production/body weight                  | Decreased       | Increased                         | Increased                     |
| Indirect calorimetry                      | Water consumption/body weight                | Decreased       | Increased                         | Increased                     |
| <b><i>Thyroid gland</i></b>               |                                              |                 |                                   |                               |
| Histopathology                            | Thyroid follicle size                        | Increased       | Decreased                         | Decreased                     |



---

## Supplementary Table 4

**Aging phenotypes not altered or worsened by every-other-day feeding.** Age-sensitive traits not modified by every-other-day feeding are denoted in blue. Age-sensitive traits exacerbated by every-other-day feeding are shown in red.

| Test                                  | Parameter                                                        | Aging phenotype                          |
|---------------------------------------|------------------------------------------------------------------|------------------------------------------|
| <b>Behavior and cognition</b>         |                                                                  |                                          |
| Acoustic startle reflex               | Startle response measures                                        | Decreased                                |
| Auditory brain response               | Evoked potentials                                                | Decreased                                |
| Hot plate                             | Latency to respond                                               | Increased                                |
| Indirect calorimetry                  | Activity-related measures (x-axis) in home cage                  | Increased                                |
| Indirect calorimetry                  | Rearing activity in home cage                                    | Increased                                |
| Open field                            | Latency to enter the center                                      | Increased                                |
| Pre-pulse inhibition related measures | PPI measures                                                     | Decreased                                |
| Rotarod                               | Motor coordination                                               | Decreased                                |
| SHIRPA                                | Tail elevation                                                   | Increased                                |
| SHIRPA                                | Response to acoustic stimulus                                    | Increased                                |
| RNA-seq                               | Gene expression in brain                                         | Aging-associated transcriptional changes |
| <b>Body composition</b>               |                                                                  |                                          |
| NMR minispec                          | Fat mass                                                         | Increased                                |
| NMR minispec                          | Lean mass                                                        | Decreased                                |
| NMR minispec                          | Fat mass/lean mass ratio                                         | Increased                                |
| <b>Body size and organ weights</b>    |                                                                  |                                          |
| Body size                             | Tail length                                                      | Increased                                |
| Organ weight                          | Pancreas weight                                                  | Increased                                |
| Organ weight                          | Testis weight                                                    | Decreased                                |
| <b>Bone</b>                           |                                                                  |                                          |
| Micro-CT                              | Marrow area                                                      | Increased                                |
| Micro-CT                              | Mean polar moment of inertia                                     | Increased                                |
| Micro-CT                              | Cortical thickness                                               | Decreased                                |
| <b>Cardiovascular system</b>          |                                                                  |                                          |
| Echocardiography                      | Interventricular septum in systole                               | Increased                                |
| Echocardiography                      | Left ventricular posterior wall in diastole                      | Increased                                |
| Echocardiography                      | Stroke volume                                                    | Increased                                |
| Echocardiography                      | Cardiac output                                                   | Increased                                |
| Electrocardiography                   | Heart rate                                                       | Decreased                                |
| Electrocardiography                   | Duration of RR interval                                          | Increased                                |
| Electrocardiography                   | Duration of PQ interval                                          | Decreased                                |
| Electrocardiography                   | Duration of PR interval                                          | Decreased                                |
| Electrocardiography                   | Duration of QRS interval                                         | Increased                                |
| Electrocardiography                   | QTc dispersion                                                   | Decreased                                |
| <b>Clinical chemistry</b>             |                                                                  |                                          |
| Clinical chemistry                    | Plasma concentration of non-esterified fatty acids after fasting | Decreased                                |
| Clinical chemistry                    | Plasma sodium concentration                                      | Increased                                |
| Clinical chemistry                    | Plasma potassium concentration                                   | Increased                                |
| Clinical chemistry                    | Plasma alkaline phosphatase activity                             | Increased                                |

|                      |                                                 |           |
|----------------------|-------------------------------------------------|-----------|
| Clinical chemistry   | Plasma glucose concentration                    | Decreased |
| Clinical chemistry   | Plasma albumin concentration                    | Decreased |
| <b>Eye</b>           |                                                 |           |
| Scheimpflug imaging  | Optical density measures of the lens            | Decreased |
| <b>Hematology</b>    |                                                 |           |
| Hematology           | Red blood cell count                            | Decreased |
| Hematology           | Platelet count                                  | Increased |
| Hematology           | Mean corpuscular hemoglobin concentration       | Decreased |
| Hematology           | Platelet large cell ratio                       | Increased |
| Hematology           | Plateletcrit                                    | Increased |
| Hematology           | OD blood                                        | Increased |
| <b>Immune system</b> |                                                 |           |
| Immunology           | Ly6C <sup>+</sup> T cell frequencies            | Increased |
| Immunology           | B2 cell frequencies                             | Decreased |
| Immunology           | CD11b <sup>+</sup> B cell frequencies           | Increased |
| Immunology           | Ly6C <sup>+</sup> B cell frequencies            | Increased |
| Immunology           | NK cell frequencies                             | Decreased |
| Immunology           | CD11b <sup>+</sup> NK cell frequencies          | Decreased |
| Immunology           | Granulocyte frequencies                         | Increased |
| Immunology           | Ly6C <sup>+</sup> monocyte frequencies          | Increased |
| Immunology           | Ly6C <sup>-</sup> monocyte frequencies          | Increased |
| Immunology           | CD45 <sup>+</sup> non-specific cell frequencies | Increased |
| Ig measurement       | IgE plasma concentration                        | Increased |
| <b>Lung</b>          |                                                 |           |
| Histopathology       | Broncheoli-associated lymphoid tissue           | Increased |
| <b>Muscle</b>        |                                                 |           |
| Grip strength        | Forelimb muscle strength                        | Decreased |
| Grip strength        | 4-paw muscle strength                           | Decreased |
| <b>Testes</b>        |                                                 |           |
| Histopathology       | Seminiferous epithelium                         | Decreased |

---

## Supplementary Table 5

**Every-other-day feeding effects on age-insensitive parameters.** This table summarizes parameters that were modified by every-other-day feeding but not by age of the animal.

| Test                               | Parameter                                       | Effect of every-other-day feeding |                               |
|------------------------------------|-------------------------------------------------|-----------------------------------|-------------------------------|
|                                    |                                                 | Aged mice/<br>lifelong EOD        | Young mice/<br>short-term EOD |
| <b>Adrenal gland</b>               |                                                 |                                   |                               |
| Histopathology                     | Lipofuscin deposition                           | Decreased                         | Decreased                     |
| <b>Behavior and cognition</b>      |                                                 |                                   |                               |
| Indirect calorimetry               | Activity-related measures (y-axis) in home cage | Increased                         | Increased                     |
| SHIRPA                             | Immediate movement at transfer arousal          | Increased                         | Increased                     |
| SHIRPA                             | Absent urination                                | Decreased                         | Decreased                     |
| <b>Bone size and organ weights</b> |                                                 |                                   |                               |
| Bone size                          | Tibia length                                    | Decreased                         | Decreased                     |
| Organ weight                       | Brain weight                                    | Decreased                         | Decreased                     |
| <b>Cardiovascular system</b>       |                                                 |                                   |                               |
| Echocardiography                   | Left ventricular inner dimension in systole     | Decreased                         | Decreased                     |
| Echocardiography                   | Left ventricular posterior wall in systole      | Decreased                         | Decreased                     |
| Echocardiography                   | Fractional shortening                           | Increased                         | Increased                     |
| Echocardiography                   | Ejection fraction                               | Increased                         | Increased                     |
| <b>Clinical chemistry</b>          |                                                 |                                   |                               |
| Clinical chemistry                 | Plasma cholesterol concentration after fasting  | Decreased                         | Decreased                     |
| Clinical chemistry                 | Plasma triglyceride concentration after fasting | Decreased                         | Decreased                     |
| Clinical chemistry                 | Plasma glucose concentration after fasting      | Decreased                         | Decreased                     |
| Clinical chemistry                 | Plasma HDL concentration after fasting          | Decreased                         | Decreased                     |
| Clinical chemistry                 | Plasma calcium concentration                    | Decreased                         | No effect                     |
| Clinical chemistry                 | Plasma phosphate concentration                  | Decreased                         | Decreased                     |
| Clinical chemistry                 | Total protein concentration in plasma           | Decreased                         | Decreased                     |
| Clinical chemistry                 | Plasma triglyceride concentration               | Decreased                         | Decreased                     |
| Clinical chemistry                 | Plasma iron concentration                       | Increased                         | Increased                     |
| <b>Hematology</b>                  |                                                 |                                   |                               |
| Hematology                         | White blood cell count                          | Decreased                         | Decreased                     |
| Hematology                         | Mean corpuscular volume                         | Increased                         | Increased                     |
| Hematology                         | Mean corpuscular hemoglobin content             | Increased                         | Increased                     |
| <b>Immune system</b>               |                                                 |                                   |                               |
| Immunology                         | CD45 <sup>+</sup> leukocyte counts              | Decreased                         | Decreased                     |
| Immunology                         | Ly6C <sup>+</sup> NK cells                      | Increased                         | Increased                     |
| <b>Kidney</b>                      |                                                 |                                   |                               |
| Histopathology                     | Vascular hyaline deposition                     | Decreased                         | Decreased                     |
| <b>Metabolism</b>                  |                                                 |                                   |                               |
| Glucose tolerance                  | Glucose tolerance                               | Decreased                         | Decreased                     |
| <b>Skin</b>                        |                                                 |                                   |                               |
| Transepidermal water loss          | Transpiration                                   | Increased                         | Increased                     |

## Supplementary Table 6

### Assessment of age-related neurobehavioral phenotypes via a modified SHIRPA test battery.

| Parameter                 | young+AL<br>(n = 16)                  | young+EOD<br>(n = 16)          | old+AL<br>(n = 23)                    | old+EOD<br>(n = 23)                   |
|---------------------------|---------------------------------------|--------------------------------|---------------------------------------|---------------------------------------|
| locomotor activity        | 23.25 ± 1.33                          | 27.19 ± 1.15                   | 15.26 ± 0.90                          | 18.35 ± 0.94                          |
| tremor                    | all absent                            | all absent                     | 22 absent, 1 present                  | 21 absent, 2 present                  |
| defecation                | 9 present, 7 absent                   | 8 present, 8 absent            | 6 present, 17 absent                  | 11 present, 12 absent                 |
| transfer arousal          | 12 brief freeze, 4 immediate movement | 16 of 16 immediate movement    | 21 brief freeze, 2 immediate movement | 17 brief freeze, 6 immediate movement |
| gait                      | all fluid                             | all fluid                      | 20 fluid, 3 abnormal                  | 20 fluid, 3 abnormal                  |
| tail elevation            | 15 horizontal, 1 elevated             | all horizontal                 | 19 horizontal, 4 elevated             | 16 horizontal, 7 elevated             |
| checkbox startle response | all preyer reflex                     | all preyer reflex              | 1 preyer reflex, 22 no reaction       | 4 preyer reflex, 19 no reaction       |
| touch escape              | all response to touch                 | all response to touch          | all response to touch                 | all response to touch                 |
| trunk curl                | all absent                            | all absent                     | all absent                            | all absent                            |
| limb gasping              | all absent                            | all absent                     | all absent                            | all absent                            |
| pinna reflex              | all present                           | all present                    | all present                           | all present                           |
| contact righting reflex   | all present                           | all present                    | all present                           | all present                           |
| urination                 | 5 present, 11 absent                  | 9 present, 7 absent            | 3 present, 20 absent                  | 5 present, 18 absent                  |
| evidence of biting        | 13 no aggression, 3 aggressive        | 14 no aggression, 2 aggressive | 23 of 23 no aggression                | 22 no aggression, 1 aggressive        |
| vocalisation              | 15 no, 1 yes                          | 13 no, 3 yes                   | 23 of 23 no                           | 23 of 23 no                           |
| unexpected behavior       | all none                              | all none                       | all none                              | all none                              |
| head bobbing              | all absent                            | all absent                     | all absent                            | all absent                            |

## Supplementary Table 7

### Open-field-based assessment of exploratory activity in a novel environment.

| Parameter                       | young+AL<br>(n = 16) | young+EOD<br>(n = 16) | old+AL<br>(n = 23) | old+EOD<br>(n = 23) | effect of age<br>(p-value) | effect of diet<br>(p-value) | interaction<br>(p-value) |
|---------------------------------|----------------------|-----------------------|--------------------|---------------------|----------------------------|-----------------------------|--------------------------|
| total distance moved (m)        | 217.87 ± 5.13        | 234.86 ± 7.98         | 158.73 ± 9.80      | 199.97 ± 10.55      | <0.0001                    | 0.0031                      | 0.2069                   |
| number of rears                 | 165.13 ± 4.26        | 189.81 ± 5.89         | 106.43 ± 6.30      | 133.17 ± 5.51       | <0.0001                    | <0.0001                     | 0.8618                   |
| moved distance in center (%)    | 19.86 ± 1.06         | 22.15 ± 0.81          | 20.57 ± 1.05       | 26.78 ± 1.38        | 0.0270                     | 0.0006                      | 0.1023                   |
| time in center (%)              | 14.26 ± 0.84         | 16.61 ± 0.89          | 13.72 ± 1.14       | 18.54 ± 1.42        | 0.5670                     | 0.0042                      | 0.3102                   |
| total resting time (s)          | 145.01 ± 10.27       | 169.31 ± 9.31         | 76.81 ± 7.37       | 107.04 ± 6.39       | <0.0001                    | 0.0014                      | 0.7194                   |
| average speed (cm/s)            | 20.69 ± 0.55         | 22.81 ± 0.76          | 14.19 ± 0.79       | 18.33 ± 1.00        | <0.0001                    | 0.0008                      | 0.2611                   |
| moved distance in periphery (m) | 174.48 ± 4.35        | 182.77 ± 6.45         | 126.03 ± 7.90      | 144.67 ± 6.41       | <0.0001                    | 0.0555                      | 0.4574                   |
| resting time in periphery (s)   | 123.04 ± 7.97        | 142.61 ± 7.11         | 66.93 ± 6.06       | 87.47 ± 5.54        | <0.0001                    | 0.0034                      | 0.9419                   |
| permanence in periphery (s)     | 1028.83 ± 10.05      | 1000.76 ± 10.72       | 1035.28 ± 13.72    | 977.46 ± 17.05      | 0.5636                     | 0.0041                      | 0.3087                   |
| speed in periphery (cm/s)       | 19.34 ± 0.56         | 21.36 ± 0.77          | 13.13 ± 0.87       | 16.48 ± 0.89        | <0.0001                    | 0.0021                      | 0.4347                   |
| moved distance in center (m)    | 43.39 ± 2.62         | 52.08 ± 2.52          | 32.69 ± 2.58       | 55.29 ± 4.93        | 0.3108                     | <0.0001                     | 0.0623                   |
| resting time in center (s)      | 21.98 ± 2.98         | 26.71 ± 3.13          | 9.89 ± 2.15        | 19.59 ± 2.17        | 0.0004                     | 0.0064                      | 0.3361                   |
| permanence in center (s)        | 171.18 ± 10.05       | 199.24 ± 10.72        | 164.72 ± 13.72     | 222.55 ± 17.06      | 0.5634                     | 0.0041                      | 0.3086                   |
| speed in center (cm/s)          | 29.03 ± 0.94         | 30.36 ± 0.81          | 21.71 ± 1.24       | 27.38 ± 1.26        | <0.0001                    | 0.0042                      | 0.0705                   |
| latency to enter the center (s) | 13.35 ± 3.47         | 10.15 ± 1.95          | 56.80 ± 14.39      | 54.77 ± 25.10       | 0.0140                     | 0.8816                      | 0.9734                   |
| number of center entries        | 214.31 ± 12.26       | 251.13 ± 11.34        | 162.83 ± 12.45     | 239.13 ± 20.92      | 0.0540                     | 0.0008                      | 0.2270                   |

## Supplementary Table 8

### Assessment of aging-associated changes in optical density of the lens using Scheimpflug imaging.

| Parameter                         | young+AL<br>(n = 7) | young+EOD<br>(n = 8) | old+AL<br>(n = 7) | old+EOD<br>(n = 6) | effect of age<br>(p-value) | effect of diet<br>(p-value) | interaction<br>(p-value) |
|-----------------------------------|---------------------|----------------------|-------------------|--------------------|----------------------------|-----------------------------|--------------------------|
| description of lens/cornea        | all normal          | all normal           | all normal        | all normal         |                            |                             |                          |
| minimal density of left lens (%)  | 3.96 ± 0.16         | 3.95 ± 0.09          | 5.03 ± 0.22       | 4.10 ± 0.14        | <b>0.0008</b>              | <b>0.0069</b>               | <b>0.0077</b>            |
| maximal density of left lens (%)  | 7.26 ± 0.32         | 7.48 ± 0.22          | 8.67 ± 0.35       | 8.57 ± 0.95        | <b>0.0203</b>              | 0.9075                      | 0.7542                   |
| mean density of left lens (%)     | 5.03 ± 0.10         | 5.26 ± 0.20          | 6.43 ± 0.19       | 5.90 ± 0.23        | <b>&lt;0.0001</b>          | 0.4305                      | 0.0513                   |
| minimal density of right lens (%) | 4.41 ± 0.17         | 4.45 ± 0.21          | 4.47 ± 0.15       | 4.50 ± 0.23        | 0.7832                     | 0.8688                      | 0.9854                   |
| maximal density of right lens (%) | 8.19 ± 0.37         | 7.86 ± 0.15          | 10.26 ± 0.58      | 10.08 ± 1.17       | <b>0.0018</b>              | 0.6877                      | 0.9037                   |
| mean density of right lens (%)    | 5.57 ± 0.11         | 5.79 ± 0.11          | 6.87 ± 0.18       | 6.87 ± 0.15        | <b>&lt;0.0001</b>          | 0.4488                      | 0.4289                   |

## Supplementary Table 9

### Assessment of the posterior part of the eye by optical coherence tomography.

| Parameter                        | young+AL<br>(n = 16) | young+EOD<br>(n = 16) | old+AL<br>(n = 21)    | old+EOD<br>(n = 22)   | effect of age<br>(p-value) | effect of diet<br>(p-value) | interaction<br>(p-value) |
|----------------------------------|----------------------|-----------------------|-----------------------|-----------------------|----------------------------|-----------------------------|--------------------------|
| description of fundus            | 16 of 16 normal      | 14 normal, 2 abnormal | 20 normal, 1 abnormal | 21 normal, 1 abnormal |                            |                             |                          |
| pigmentation left fundus         | all normal           | all normal            | all normal            | all normal            |                            |                             |                          |
| pigmentation right fundus        | all normal           | all normal            | all normal            | all normal            |                            |                             |                          |
| optic disc left fundus           | all normal           | all normal            | all normal            | all normal            |                            |                             |                          |
| optic disc right fundus          | all normal           | all normal            | all normal            | all normal            |                            |                             |                          |
| number of vessels left fundus    | 9.44 ± 0.43          | 10.06 ± 0.31          | 9.55 ± 0.28           | 9.68 ± 0.38           | 0.7107                     | 0.2968                      | 0.4956                   |
| number of vessels right fundus   | 9.87 ± 0.46          | 10.25 ± 0.35          | 9.80 ± 0.30           | 10.45 ± 0.35          | 0.8532                     | 0.1667                      | 0.7161                   |
| retina left eye                  | all present          | all present           | all present           | all present           |                            |                             |                          |
| retina right eye                 | all present          | all present           | all present           | all present           |                            |                             |                          |
| retinal thickness left eye (µm)  | 251.00 ± 1.23        | 254.00 ± 1.51         | 252.65 ± 1.32         | 255.18 ± 1.34         | 0.3099                     | <b>0.0496</b>               | 0.8662                   |
| retinal thickness right eye (µm) | 252.50 ± 1.38        | 253.06 ± 1.69         | 252.30 ± 1.24         | 252.45 ± 1.25         | 0.7733                     | 0.7982                      | 0.8843                   |



## Supplementary Table 10

### Echocardiography-based assessment of cardiac dimensional and functional measures.

| Parameter                                              | young+AL<br>(n = 10) | young+EOD<br>(n = 9) | old+AL<br>(n = 11) | old+EOD<br>(n = 11) | effect of age<br>(p-value) | effect of diet<br>(p-value) | interaction<br>(p-value) |
|--------------------------------------------------------|----------------------|----------------------|--------------------|---------------------|----------------------------|-----------------------------|--------------------------|
| heart rate (bpm)                                       | 537.091 ± 53.010     | 610.692 ± 26.244     | 553.858 ± 47.301   | 597.771 ± 33.289    | 0.9639                     | 0.1720                      | 0.7270                   |
| respiration rate (1/min)                               | 181.180 ± 10.725     | 198.137 ± 16.087     | 191.732 ± 10.414   | 182.012 ± 13.037    | 0.8259                     | 0.7752                      | 0.2959                   |
| interventricular septum in diastole (mm)               | 0.562 ± 0.004        | 0.548 ± 0.005        | 0.576 ± 0.004      | 0.565 ± 0.006       | <b>0.0030</b>              | <b>0.0116</b>               | 0.8076                   |
| interventricular septum in systole (mm)                | 0.556 ± 0.004        | 0.559 ± 0.005        | 0.575 ± 0.006      | 0.570 ± 0.006       | <b>0.0093</b>              | 0.8790                      | 0.4959                   |
| left ventricular internal dimension in diastole (mm)   | 2.674 ± 0.152        | 2.268 ± 0.065        | 2.997 ± 0.161      | 2.738 ± 0.123       | <b>0.0057</b>              | <b>0.0187</b>               | 0.5897                   |
| left ventricular internal dimension in systole (mm)    | 1.400 ± 0.136        | 1.023 ± 0.082        | 1.645 ± 0.178      | 1.238 ± 0.087       | 0.0876                     | <b>0.0049</b>               | 0.9103                   |
| left ventricular posterior wall width in diastole (mm) | 0.543 ± 0.006        | 0.539 ± 0.006        | 0.553 ± 0.002      | 0.553 ± 0.004       | <b>0.0168</b>              | 0.6647                      | 0.6647                   |
| left ventricular posterior wall in systole (mm)        | 0.541 ± 0.003        | 0.526 ± 0.006        | 0.545 ± 0.004      | 0.540 ± 0.005       | 0.0583                     | <b>0.0364</b>               | 0.2441                   |
| fractional shortening (%)                              | 50.212 ± 2.926       | 56.384 ± 2.816       | 47.722 ± 3.610     | 57.423 ± 2.309      | 0.8093                     | <b>0.0116</b>               | 0.5584                   |
| left ventricular mass corrected (mg)                   | 32.953 ± 2.733       | 24.081 ± 1.276       | 39.865 ± 4.054     | 33.411 ± 2.481      | <b>0.0091</b>              | <b>0.0134</b>               | 0.6841                   |
| ejection fraction (%)                                  | 81.952 ± 2.882       | 87.694 ± 2.091       | 78.477 ± 3.582     | 88.055 ± 1.584      | 0.5679                     | <b>0.0074</b>               | 0.4822                   |
| stroke volume (μl)                                     | 22.438 ± 2.523       | 15.444 ± 1.002       | 27.685 ± 2.847     | 25.274 ± 2.627      | <b>0.0042</b>              | 0.0646                      | 0.3595                   |
| cardiac output (ml/min)                                | 11.529 ± 1.527       | 9.400 ± 0.716        | 14.767 ± 1.645     | 14.457 ± 1.106      | <b>0.0038</b>              | 0.3695                      | 0.5025                   |

## Supplementary Table 11

### Electrocardiography-based assessment of electrical properties of the heart.

| Parameter                    | young+AL<br>(n = 10) | young+EOD<br>(n = 9) | old+AL<br>(n = 11) | old+EOD<br>(n = 11) | effect of age<br>(p-value) | effect of diet<br>(p-value) | interaction<br>(p-value) |
|------------------------------|----------------------|----------------------|--------------------|---------------------|----------------------------|-----------------------------|--------------------------|
| heart rate (bpm)             | 749.50 ± 10.54       | 738.89 ± 8.37        | 737.64 ± 8.20      | 665.36 ± 14.35      | <b>0.0004</b>              | <b>0.0005</b>               | <b>0.0077</b>            |
| heart rate variability (bpm) | 26.02 ± 15.08        | 36.60 ± 22.33        | 27.88 ± 13.83      | 22.21 ± 14.32       | 0.7028                     | 0.8811                      | 0.6209                   |
| signal intensity (%)         | 3.35 ± 1.92          | 4.80 ± 2.86          | 3.64 ± 1.77        | 3.25 ± 2.03         | 0.7705                     | 0.8059                      | 0.6684                   |
| RR interval (ms)             | 80.62 ± 0.99         | 81.79 ± 0.87         | 81.65 ± 0.79       | 90.87 ± 1.95        | <b>0.0004</b>              | <b>0.0003</b>               | <b>0.0036</b>            |
| PQ interval (ms)             | 20.72 ± 1.00         | 19.54 ± 1.23         | 16.18 ± 1.52       | 16.12 ± 1.38        | <b>0.0048</b>              | 0.6435                      | 0.6779                   |
| PR interval (ms)             | 26.45 ± 1.26         | 25.74 ± 1.32         | 22.45 ± 1.47       | 23.24 ± 1.31        | <b>0.0216</b>              | 0.9751                      | 0.5848                   |
| QRS interval (ms)            | 9.82 ± 0.28          | 10.08 ± 0.16         | 10.31 ± 0.21       | 11.80 ± 0.59        | <b>0.0051</b>              | <b>0.0239</b>               | 0.1050                   |
| QT interval (ms)             | 41.26 ± 0.79         | 39.26 ± 0.95         | 41.63 ± 0.74       | 46.45 ± 1.24        | <b>0.0004</b>              | 0.1527                      | <b>0.0011</b>            |
| ST interval (ms)             | 31.93 ± 0.81         | 29.69 ± 0.85         | 31.83 ± 0.74       | 35.11 ± 0.96        | <b>0.0034</b>              | 0.5443                      | <b>0.0025</b>            |
| QTc interval (ms)            | 45.99 ± 0.63         | 43.50 ± 0.93         | 46.11 ± 0.73       | 48.72 ± 0.99        | <b>0.0030</b>              | 0.9438                      | <b>0.0044</b>            |
| QT dispersion (ms)           | 22.30 ± 1.75         | 23.06 ± 1.52         | 18.36 ± 0.98       | 20.59 ± 2.28        | 0.0714                     | 0.3926                      | 0.6720                   |
| QTc dispersion (ms)          | 24.90 ± 2.00         | 27.84 ± 2.62         | 22.15 ± 1.38       | 22.09 ± 1.82        | <b>0.0350</b>              | 0.4619                      | 0.4453                   |
| SR amplitude (mV)            | 0.93 ± 0.11          | 0.86 ± 0.11          | 0.77 ± 0.12        | 0.78 ± 0.14         | 0.3286                     | 0.7660                      | 0.7438                   |
| R amplitude (mV)             | 0.68 ± 0.08          | 0.67 ± 0.08          | 0.61 ± 0.09        | 0.63 ± 0.10         | 0.5917                     | 0.9841                      | 0.8504                   |
| rMSSD (ms)                   | 2.85 ± 1.64          | 3.84 ± 2.25          | 3.02 ± 1.33        | 2.52 ± 1.10         | 0.7149                     | 0.8775                      | 0.6391                   |
| pNN50 (%)                    | 10.56 ± 9.95         | 1.08 ± 0.73          | 4.44 ± 3.39        | 1.23 ± 0.84         | 0.5722                     | 0.2327                      | 0.5528                   |

rMSSD = root mean square of the successive differences of neighboring RR intervals, pNN50 = percentage of adjacent RR intervals with differences larger than 50 ms

## Supplementary Table 12

### Assessment of bone structure via micro-CT.

| Parameter                                  | young+AL<br>(n = 16) | young+EOD<br>(n = 9) | old+AL<br>(n = 17) | old+EOD<br>(n = 9) | effect of age<br>(p-value) | effect of diet<br>(p-value) | interaction<br>(p-value) |
|--------------------------------------------|----------------------|----------------------|--------------------|--------------------|----------------------------|-----------------------------|--------------------------|
| total tissue area (mm <sup>2</sup> )       | 0.730 ± 0.011        | 0.738 ± 0.019        | 0.757 ± 0.014      | 0.754 ± 0.016      | 0.1753                     | 0.8625                      | 0.7165                   |
| bone area (mm <sup>2</sup> )               | 0.615 ± 0.009        | 0.616 ± 0.017        | 0.625 ± 0.014      | 0.625 ± 0.015      | 0.4948                     | 0.9889                      | 0.9657                   |
| marrow area (mm <sup>2</sup> )             | 0.115 ± 0.002        | 0.122 ± 0.003        | 0.131 ± 0.001      | 0.129 ± 0.002      | <b>&lt;0.0001</b>          | 0.2072                      | <b>0.0130</b>            |
| polar moment of inertia (mm <sup>4</sup> ) | 0.109 ± 0.004        | 0.126 ± 0.007        | 0.154 ± 0.004      | 0.150 ± 0.006      | <b>&lt;0.0001</b>          | 0.2481                      | 0.0525                   |
| cortical thickness (mm)                    | 0.219 ± 0.003        | 0.199 ± 0.007        | 0.178 ± 0.004      | 0.179 ± 0.004      | <b>&lt;0.0001</b>          | <b>0.0397</b>               | <b>0.0304</b>            |

## Supplementary Table 13

### Analysis of metabolic parameters using indirect calorimetry.

| Parameter                                                       | young+AL<br>(n = 16) | young+EOD<br>(n = 16) | old+AL<br>(n = 16) | old+EOD<br>(n = 16) | effect of age<br>(p-value) | effect of diet<br>(p-value) | interaction<br>(p-value) |
|-----------------------------------------------------------------|----------------------|-----------------------|--------------------|---------------------|----------------------------|-----------------------------|--------------------------|
| O <sub>2</sub> consumption (ml/h)                               | 79.71 ± 1.57         | 75.52 ± 2.01          | 90.79 ± 2.07       | 80.24 ± 1.62        | <0.0001                    | 0.0002                      | 0.0883                   |
| O <sub>2</sub> consumption/body weight (ml/h per g body weight) | 2.76 ± 0.06          | 3.07 ± 0.09           | 2.25 ± 0.06        | 2.58 ± 0.05         | <0.0001                    | <0.0001                     | 0.9423                   |
| CO <sub>2</sub> production (ml/h)                               | 70.50 ± 1.77         | 66.57 ± 2.04          | 74.46 ± 1.61       | 69.34 ± 1.59        | 0.0609                     | 0.0126                      | 0.7373                   |
| CO <sub>2</sub> production/body weight (ml/h per g body weight) | 2.44 ± 0.07          | 2.71 ± 0.09           | 1.86 ± 0.06        | 2.23 ± 0.05         | <0.0001                    | <0.0001                     | 0.4368                   |
| mean respiratory exchange rate                                  | 0.88 ± 0.01          | 0.87 ± 0.01           | 0.82 ± 0.01        | 0.86 ± 0.01         | 0.0002                     | 0.0799                      | 0.0076                   |
| respiratory exchange rate (feasting day)                        | 0.86 ± 0.01          | 0.93 ± 0.01           | 0.81 ± 0.01        | 0.89 ± 0.01         | <0.0001                    | <0.0001                     | 0.6842                   |
| respiratory exchange rate (fasting day)                         | 0.89 ± 0.01          | 0.78 ± 0.01           | 0.83 ± 0.02        | 0.81 ± 0.01         | 0.2212                     | <0.0001                     | 0.0003                   |
| heat production (kcal/h)                                        | 0.39 ± 0.01          | 0.37 ± 0.01           | 0.44 ± 0.01        | 0.39 ± 0.01         | 0.0003                     | 0.0004                      | 0.1510                   |
| total movement x-axis per minute                                | 27.84 ± 1.28         | 35.68 ± 2.51          | 35.15 ± 2.79       | 44.12 ± 4.83        | 0.0145                     | 0.0093                      | 0.8570                   |
| ambulatory movement x-axis per minute                           | 19.19 ± 0.83         | 26.13 ± 1.96          | 24.89 ± 3.13       | 33.05 ± 3.99        | 0.0143                     | 0.0037                      | 0.8090                   |
| fine movement x-axis per minute                                 | 8.65 ± 0.56          | 9.55 ± 0.69           | 10.26 ± 0.81       | 11.07 ± 0.87        | 0.0400                     | 0.2557                      | 0.9557                   |
| total movement y-axis per minute                                | 34.92 ± 3.07         | 40.19 ± 2.18          | 32.07 ± 2.08       | 39.24 ± 3.79        | 0.5104                     | 0.0339                      | 0.7423                   |
| ambulatory movement y-axis per minute                           | 22.14 ± 1.43         | 27.62 ± 1.62          | 20.88 ± 1.65       | 26.57 ± 2.96        | 0.5667                     | 0.0072                      | 0.9578                   |
| fine movement y-axis per minute                                 | 12.78 ± 1.68         | 12.57 ± 0.61          | 11.19 ± 0.47       | 12.67 ± 0.88        | 0.4719                     | 0.5364                      | 0.4154                   |
| rearing movement z-axis per minute                              | 6.64 ± 0.87          | 8.41 ± 1.15           | 11.66 ± 1.83       | 10.40 ± 0.96        | 0.0072                     | 0.8401                      | 0.2339                   |
| moved distance (cm/min)                                         | 170.27 ± 20.67       | 205.90 ± 22.53        | 173.45 ± 12.64     | 209.00 ± 20.52      | 0.8723                     | 0.0722                      | 0.9983                   |
| speed (cm/s)                                                    | 2.83 ± 0.34          | 3.42 ± 0.37           | 2.87 ± 0.21        | 3.48 ± 0.34         | 0.8746                     | 0.0702                      | 0.9793                   |
| mean food intake (g/day)                                        | 2.55 ± 0.17          | 2.08 ± 0.16           | 1.55 ± 0.21        | 1.51 ± 0.22         | 0.0001                     | 0.1898                      | 0.2589                   |
| food intake/body weight (g/day per g body weight)               | 0.09 ± 0.01          | 0.08 ± 0.01           | 0.04 ± 0.01        | 0.05 ± 0.01         | <0.0001                    | 0.7335                      | 0.3214                   |
| mean water consumption (ml/day)                                 | 3.32 ± 0.16          | 4.08 ± 0.43           | 2.22 ± 0.28        | 3.46 ± 0.25         | 0.0068                     | 0.0013                      | 0.0937                   |
| water consumption/body weight (ml/day per g body weight)        | 0.12 ± 0.01          | 0.15 ± 0.01           | 0.06 ± 0.01        | 0.11 ± 0.01         | <0.0001                    | <0.0001                     | 0.2821                   |
| water consumption (ml/day) (feeding day)                        | 3.21 ± 0.21          | 5.84 ± 0.49           | 2.02 ± 0.35        | 5.22 ± 0.55         | 0.0348                     | <0.0001                     | 0.5019                   |
| water consumption (ml/day) (fasting day)                        | 3.43 ± 0.17          | 1.63 ± 0.22           | 2.42 ± 0.32        | 1.71 ± 0.33         | 0.0889                     | <0.0001                     | 0.0466                   |

## Supplementary Table 14

### Basic hematological analyses.

| Parameter                                        | young+AL<br>(n = 16) | young+EOD<br>(n = 16) | old+AL<br>(n = 20) | old+EOD<br>(n = 22) | effect of age<br>(p-value) | effect of diet<br>(p-value) | interaction<br>(p-value) |
|--------------------------------------------------|----------------------|-----------------------|--------------------|---------------------|----------------------------|-----------------------------|--------------------------|
| white blood cell counts ( $10^3/\text{mm}^3$ )   | 12.30 ± 0.55         | 8.86 ± 0.52           | 14.69 ± 1.57       | 9.14 ± 0.83         | 0.2091                     | <b>&lt;0.0001</b>           | 0.3195                   |
| red blood cell counts ( $10^6/\text{mm}^3$ )     | 11.53 ± 0.20         | 11.42 ± 0.29          | 9.53 ± 0.36        | 9.88 ± 0.13         | <b>&lt;0.0001</b>          | 0.6349                      | 0.3859                   |
| platelet counts ( $10^5/\text{mm}^3$ )           | 1.17 ± 0.05          | 1.22 ± 0.03           | 2.31 ± 0.12        | 2.34 ± 0.11         | <b>&lt;0.0001</b>          | 0.7129                      | 0.9619                   |
| hemoglobin (g/dl)                                | 17.47 ± 0.28         | 18.06 ± 0.43          | 14.24 ± 0.42       | 15.50 ± 0.21        | <b>&lt;0.0001</b>          | <b>0.0097</b>               | 0.3340                   |
| hematocrit (%)                                   | 53.92 ± 0.87         | 56.07 ± 1.39          | 44.76 ± 1.23       | 48.63 ± 0.63        | <b>&lt;0.0001</b>          | <b>0.0054</b>               | 0.4129                   |
| mean corpuscular volume (fl)                     | 46.88 ± 0.15         | 49.25 ± 0.14          | 47.75 ± 1.36       | 49.23 ± 0.30        | 0.5826                     | <b>0.0149</b>               | 0.5627                   |
| mean corpuscular hemoglobin content (pg)         | 15.16 ± 0.08         | 15.83 ± 0.10          | 15.13 ± 0.30       | 15.69 ± 0.13        | 0.6639                     | <b>0.0020</b>               | 0.7910                   |
| mean corpuscular hemoglobin concentration (g/dl) | 32.40 ± 0.16         | 32.23 ± 0.20          | 31.77 ± 0.29       | 31.88 ± 0.21        | <b>0.0368</b>              | 0.8923                      | 0.5358                   |
| red blood cell distribution width (%)            | 14.31 ± 0.18         | 13.49 ± 0.13          | 15.50 ± 0.49       | 13.67 ± 0.15        | <b>0.0253</b>              | <b>&lt;0.0001</b>           | 0.0959                   |
| platelet volume (fl)                             | 6.07 ± 0.03          | 6.02 ± 0.02           | 6.41 ± 0.08        | 6.25 ± 0.03         | <b>&lt;0.0001</b>          | <b>0.0450</b>               | 0.2994                   |
| platelet distribution width (%)                  | 5.32 ± 0.04          | 5.23 ± 0.03           | 5.76 ± 0.12        | 5.55 ± 0.04         | <b>&lt;0.0001</b>          | <b>0.0440</b>               | 0.4476                   |
| platelet large cell ratio (%)                    | 1.83 ± 0.11          | 1.67 ± 0.10           | 3.20 ± 0.40        | 2.43 ± 0.11         | <b>&lt;0.0001</b>          | 0.0585                      | 0.2084                   |
| plateletcrit (%)                                 | 0.71 ± 0.03          | 0.73 ± 0.02           | 1.47 ± 0.08        | 1.46 ± 0.07         | <b>&lt;0.0001</b>          | 0.9500                      | 0.8447                   |

## Supplementary Table 15

### FACS-based leukocyte profiling in the peripheral blood.

| Parameter                                                          | young+AL<br>(n = 16) | young+EOD<br>(n = 16) | old+AL<br>(n = 20) | old+EOD<br>(n = 22) | effect of age<br>(p-value) | effect of diet<br>(p-value) | interaction<br>(p-value) |
|--------------------------------------------------------------------|----------------------|-----------------------|--------------------|---------------------|----------------------------|-----------------------------|--------------------------|
| T cells (% of leukocytes)                                          | 16.27 ± 0.48         | 19.71 ± 0.43          | 11.53 ± 0.81       | 15.37 ± 0.81        | <0.0001                    | <0.0001                     | 0.7860                   |
| Ly6C <sup>+</sup> T cells (% of T cells)                           | 22.13 ± 0.65         | 24.12 ± 0.63          | 44.53 ± 2.07       | 42.05 ± 1.98        | <0.0001                    | 0.8848                      | 0.1910                   |
| B1 cells (% of leukocytes)                                         | 1.07 ± 0.17          | 0.94 ± 0.13           | 0.69 ± 0.08        | 0.90 ± 0.13         | 0.1107                     | 0.7689                      | 0.1883                   |
| B2 cells (% of leukocytes)                                         | 61.94 ± 1.13         | 55.53 ± 1.13          | 48.29 ± 3.77       | 48.97 ± 3.46        | 0.0013                     | 0.3443                      | 0.2433                   |
| CD11b <sup>+</sup> B cells (% of B cells)                          | 1.45 ± 0.15          | 1.20 ± 0.08           | 3.43 ± 0.46        | 3.00 ± 0.43         | <0.0001                    | 0.3635                      | 0.8008                   |
| Ly6C <sup>+</sup> B cells (% of B cells)                           | 4.59 ± 0.28          | 4.09 ± 0.37           | 7.96 ± 1.13        | 5.64 ± 0.62         | 0.0017                     | 0.0641                      | 0.2304                   |
| NK cells (% of leukocytes)                                         | 2.12 ± 0.11          | 2.04 ± 0.08           | 1.12 ± 0.08        | 0.96 ± 0.07         | <0.0001                    | 0.1390                      | 0.6242                   |
| CD11b <sup>+</sup> NK cells (% of NK cells)                        | 87.88 ± 0.44         | 84.83 ± 0.56          | 81.16 ± 0.86       | 76.75 ± 1.26        | <0.0001                    | 0.0002                      | 0.4783                   |
| CD11c <sup>+</sup> NK cells (% of NK cells)                        | 43.94 ± 0.78         | 40.38 ± 1.32          | 50.47 ± 1.58       | 40.77 ± 1.31        | 0.0123                     | <0.0001                     | 0.0258                   |
| Ly6C <sup>+</sup> NK cells (% of NK cells)                         | 52.01 ± 0.86         | 57.06 ± 1.15          | 49.72 ± 1.77       | 57.85 ± 1.21        | 0.5815                     | <0.0001                     | 0.2617                   |
| NKT cells (% of leukocytes)                                        | 0.46 ± 0.05          | 0.40 ± 0.04           | 0.18 ± 0.02        | 0.40 ± 0.06         | 0.0050                     | 0.1141                      | 0.0048                   |
| granulocytes (% of leukocytes)                                     | 9.75 ± 0.44          | 9.22 ± 0.93           | 22.98 ± 3.19       | 20.46 ± 3.28        | <0.0001                    | 0.5704                      | 0.7106                   |
| Ly6C <sup>+</sup> monocytes (% of leukocytes)                      | 6.35 ± 0.50          | 9.41 ± 0.54           | 11.39 ± 1.01       | 9.73 ± 0.77         | 0.0011                     | 0.3727                      | 0.0038                   |
| Ly6C <sup>-</sup> monocytes (% of leukocytes)                      | 1.74 ± 0.11          | 2.36 ± 0.15           | 3.09 ± 0.24        | 2.59 ± 0.30         | 0.0014                     | 0.8061                      | 0.0215                   |
| Ly6C <sup>+</sup> /CD11C <sup>+</sup> monocytes (% of monocytes)   | 0.61 ± 0.05          | 0.55 ± 0.04           | 0.60 ± 0.05        | 0.56 ± 0.05         | 0.9524                     | 0.3554                      | 0.8508                   |
| Ly6C <sup>+</sup> /CD11C <sup>-</sup> monocytes (% of monocytes)   | 46.04 ± 1.98         | 44.60 ± 2.91          | 52.58 ± 1.77       | 51.24 ± 2.82        | 0.0100                     | 0.5774                      | 0.9832                   |
| Ly6C <sup>(+)</sup> /CD11C <sup>+</sup> monocytes (% of monocytes) | 6.26 ± 0.24          | 4.82 ± 0.30           | 5.22 ± 0.14        | 5.40 ± 0.29         | 0.3622                     | 0.0158                      | 0.0020                   |
| Ly6C <sup>(+)</sup> /CD11C <sup>-</sup> monocytes (% of monocytes) | 24.96 ± 2.14         | 29.69 ± 2.92          | 19.35 ± 1.50       | 21.49 ± 2.02        | 0.0020                     | 0.1147                      | 0.5513                   |
| Ly6C <sup>-</sup> /CD11C <sup>+</sup> monocytes (% of monocytes)   | 12.36 ± 0.54         | 11.74 ± 0.69          | 11.89 ± 0.44       | 12.00 ± 0.77        | 0.8752                     | 0.6925                      | 0.5770                   |
| Ly6C <sup>-</sup> /CD11C <sup>-</sup> monocytes (% of monocytes)   | 9.76 ± 0.71          | 8.61 ± 0.44           | 10.37 ± 0.83       | 9.31 ± 0.82         | 0.3954                     | 0.1526                      | 0.9523                   |
| CD45 <sup>+</sup> non specific cells (% of leukocytes)             | 0.29 ± 0.03          | 0.37 ± 0.06           | 0.72 ± 0.09        | 0.62 ± 0.09         | <0.0001                    | 0.9420                      | 0.2319                   |

Ly6C<sup>+</sup> = Ly6C high, Ly6C<sup>(+)</sup> = Ly6C medium, Ly6C<sup>-</sup> = Ly6C negative.

## Supplementary Table 16

### Clinical chemistry measures in the fed state.

| Parameter                    | young+AL<br>(n = 16) | young+EOD<br>(n = 16) | old+AL<br>(n = 20) | old+EOD<br>(n = 22) | effect of age<br>(p-value) | effect of diet<br>(p-value) | interaction<br>(p-value) |
|------------------------------|----------------------|-----------------------|--------------------|---------------------|----------------------------|-----------------------------|--------------------------|
| Na (mmol/l)                  | 154.81 ± 0.44        | 155.19 ± 0.34         | 156.20 ± 0.66      | 155.91 ± 0.32       | <b>0.0295</b>              | 0.9296                      | 0.4851                   |
| K (mmol/l)                   | 4.14 ± 0.06          | 4.13 ± 0.08           | 4.42 ± 0.09        | 4.70 ± 0.09         | <b>&lt;0.0001</b>          | 0.1441                      | 0.0949                   |
| Ca (mmol/l)                  | 2.34 ± 0.01          | 2.35 ± 0.01           | 2.39 ± 0.02        | 2.32 ± 0.02         | 0.7043                     | <b>0.0389</b>               | <b>0.0221</b>            |
| Cl (mmol/l)                  | 112.10 ± 0.43        | 112.79 ± 0.35         | 112.09 ± 0.60      | 112.86 ± 0.38       | 0.9571                     | 0.1201                      | 0.9316                   |
| inorganic phosphate (mmol/l) | 1.71 ± 0.08          | 1.47 ± 0.06           | 1.76 ± 0.04        | 1.62 ± 0.05         | 0.1000                     | <b>0.0016</b>               | 0.3776                   |
| total protein (g/l)          | 49.96 ± 0.46         | 49.19 ± 0.46          | 51.41 ± 0.73       | 48.98 ± 0.59        | 0.3075                     | <b>0.0098</b>               | 0.1696                   |
| urea (mmol/l)                | 11.20 ± 0.43         | 11.74 ± 0.49          | 13.93 ± 0.58       | 12.22 ± 0.43        | <b>0.0020</b>              | 0.2442                      | <b>0.0276</b>            |
| cholesterol (mmol/l)         | 2.41 ± 0.12          | 2.60 ± 0.04           | 2.47 ± 0.05        | 2.34 ± 0.09         | 0.2208                     | 0.7079                      | <b>0.0420</b>            |
| triglycerides (mmol/l)       | 1.52 ± 0.12          | 1.41 ± 0.13           | 1.67 ± 0.11        | 1.23 ± 0.09         | 0.9142                     | <b>0.0181</b>               | 0.1513                   |
| GPT activity (U/l)           | 46.06 ± 4.06         | 40.87 ± 4.28          | 57.50 ± 9.31       | 53.00 ± 8.35        | 0.1313                     | 0.5320                      | 0.9642                   |
| GOT activity (U/l)           | 62.63 ± 5.81         | 54.27 ± 2.14          | 68.37 ± 4.38       | 63.29 ± 4.43        | 0.1130                     | 0.1483                      | 0.7227                   |
| AP activity (U/l)            | 82.88 ± 3.26         | 81.31 ± 2.26          | 95.55 ± 5.70       | 88.27 ± 4.29        | <b>0.0290</b>              | 0.3189                      | 0.5184                   |
| glucose (mmol/l)             | 13.57 ± 0.45         | 12.63 ± 0.55          | 11.37 ± 0.32       | 11.13 ± 0.43        | <b>&lt;0.0001</b>          | 0.1864                      | 0.4299                   |
| lactate (mmol/l)             | 11.58 ± 0.33         | 12.18 ± 0.22          | 12.16 ± 0.28       | 12.35 ± 0.28        | 0.1966                     | 0.1750                      | 0.4910                   |
| Fe (µmol/l)                  | 20.03 ± 0.49         | 41.95 ± 2.95          | 23.57 ± 1.60       | 33.06 ± 1.30        | 0.1312                     | <b>&lt;0.0001</b>           | <b>0.0007</b>            |
| UIBC (µmol/l)                | 39.69 ± 1.25         | 16.81 ± 3.52          | 45.73 ± 2.40       | 33.72 ± 3.46        | <b>0.0003</b>              | <b>&lt;0.0001</b>           | 0.0763                   |
| LDH activity (U/l)           | 164.19 ± 22.75       | 123.25 ± 12.94        | 225.15 ± 13.13     | 187.33 ± 17.83      | <b>0.0006</b>              | <b>0.0269</b>               | 0.9289                   |
| albumin (g/l)                | 27.97 ± 0.58         | 28.49 ± 0.22          | 27.25 ± 0.41       | 26.99 ± 0.54        | <b>0.0237</b>              | 0.7828                      | 0.4173                   |
| α-amylase activity (U/l)     | 800.09 ± 27.21       | 764.30 ± 12.42        | 895.18 ± 54.41     | 793.15 ± 21.66      | 0.0792                     | 0.0516                      | 0.3444                   |
| fructosamine (µmol/l)        | 321.19 ± 8.57        | 320.81 ± 8.49         | 301.16 ± 9.08      | 306.36 ± 8.55       | 0.0573                     | 0.7873                      | 0.7553                   |

AP = alkaline phosphatase, GOT = aspartate-aminotransferase (ASAT), GPT = alanine-aminotransferase (ALAT), LDH = lactate-dehydrogenase, UIBC = unsaturated iron binding capacity.

## Supplementary Table 17

### Clinical chemistry measures after a 6-hour fasting period.

| Parameter                            | young+AL<br>(n = 16) | young+EOD<br>(n = 16) | old+AL<br>(n = 23) | old+EOD<br>(n = 23) | effect of age<br>(p-value) | effect of diet<br>(p-value) | interaction<br>(p-value) |
|--------------------------------------|----------------------|-----------------------|--------------------|---------------------|----------------------------|-----------------------------|--------------------------|
| fasting cholesterol (mmol/l)         | 2.463 ± 0.080        | 2.374 ± 0.060         | 2.667 ± 0.051      | 2.260 ± 0.038       | 0.4752                     | <b>0.0002</b>               | <b>0.0136</b>            |
| fasting triglycerides (mmol/l)       | 0.774 ± 0.044        | 0.633 ± 0.019         | 0.758 ± 0.055      | 0.634 ± 0.030       | 0.8696                     | <b>0.0038</b>               | 0.8422                   |
| fasting glucose (mmol/l)             | 15.356 ± 0.432       | 14.356 ± 0.306        | 15.483 ± 0.400     | 14.170 ± 0.417      | 0.9456                     | <b>0.0098</b>               | 0.7201                   |
| fasting HDL-cholesterol (mmol/l)     | 1.732 ± 0.057        | 1.583 ± 0.040         | 1.863 ± 0.038      | 1.491 ± 0.031       | 0.6656                     | <b>&lt;0.0001</b>           | <b>0.0173</b>            |
| fasting non HDL-cholesterol (mmol/l) | 0.731 ± 0.024        | 0.791 ± 0.023         | 0.804 ± 0.020      | 0.769 ± 0.015       | 0.2606                     | 0.5659                      | <b>0.0354</b>            |
| fasting glycerol (mmol/l)            | 0.102 ± 0.004        | 0.124 ± 0.004         | 0.129 ± 0.006      | 0.118 ± 0.004       | 0.0525                     | 0.2711                      | <b>0.0029</b>            |
| fasting NEFA (mmol/l)                | 0.806 ± 0.054        | 0.655 ± 0.016         | 0.661 ± 0.027      | 0.648 ± 0.028       | <b>0.0428</b>              | <b>0.0295</b>               | 0.0644                   |

HDL = high density lipoprotein, NEFA = non-esterified fatty acids.
